# Supplementary material for: Mobilization and Cellular Distribution of Phosphate in the Diatom Phaeodactylum tricornutum
Source: PubMed Central journal article supplement (PMC7283521; doi:10.3389/fpls.2020.00579), 2020-06-03
Supplement: Data_Sheet_1.pdf [file Data_Sheet_1.pdf]

*Supplementary File 1*

**Mobilization and cellular distribution of phosphate in the diatom**

*Phaeodactylum tricornutum*

**Gianluca Dell'Aquila<sup>1</sup>, Stefan Zauner<sup>1</sup>, Thomas Heimerl<sup>2</sup>, Jörg Kahnt<sup>3</sup>, Vera Samel-Gondesen<sup>1</sup>, Simon Runge<sup>1</sup>, Franziska Hempel<sup>2</sup>, Uwe G. Maier<sup>1,2,\*</sup>**

\* **Correspondence:** Prof Dr. Uwe G Maier: [maier@biologie.uni-marburg.de](mailto:maier@biologie.uni-marburg.de)

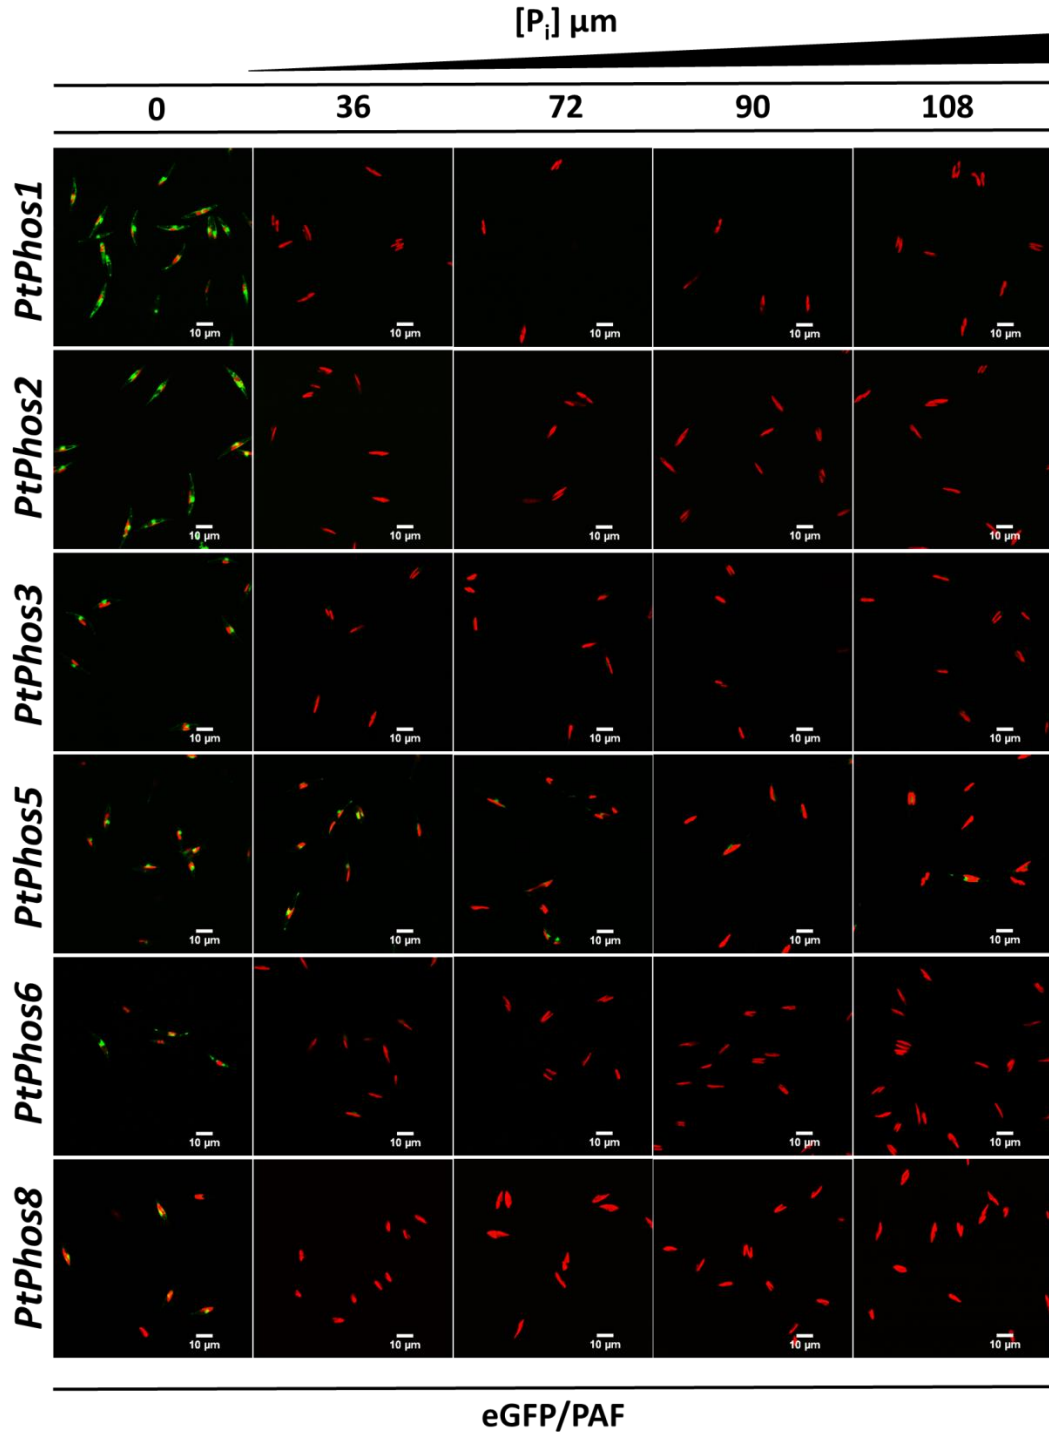

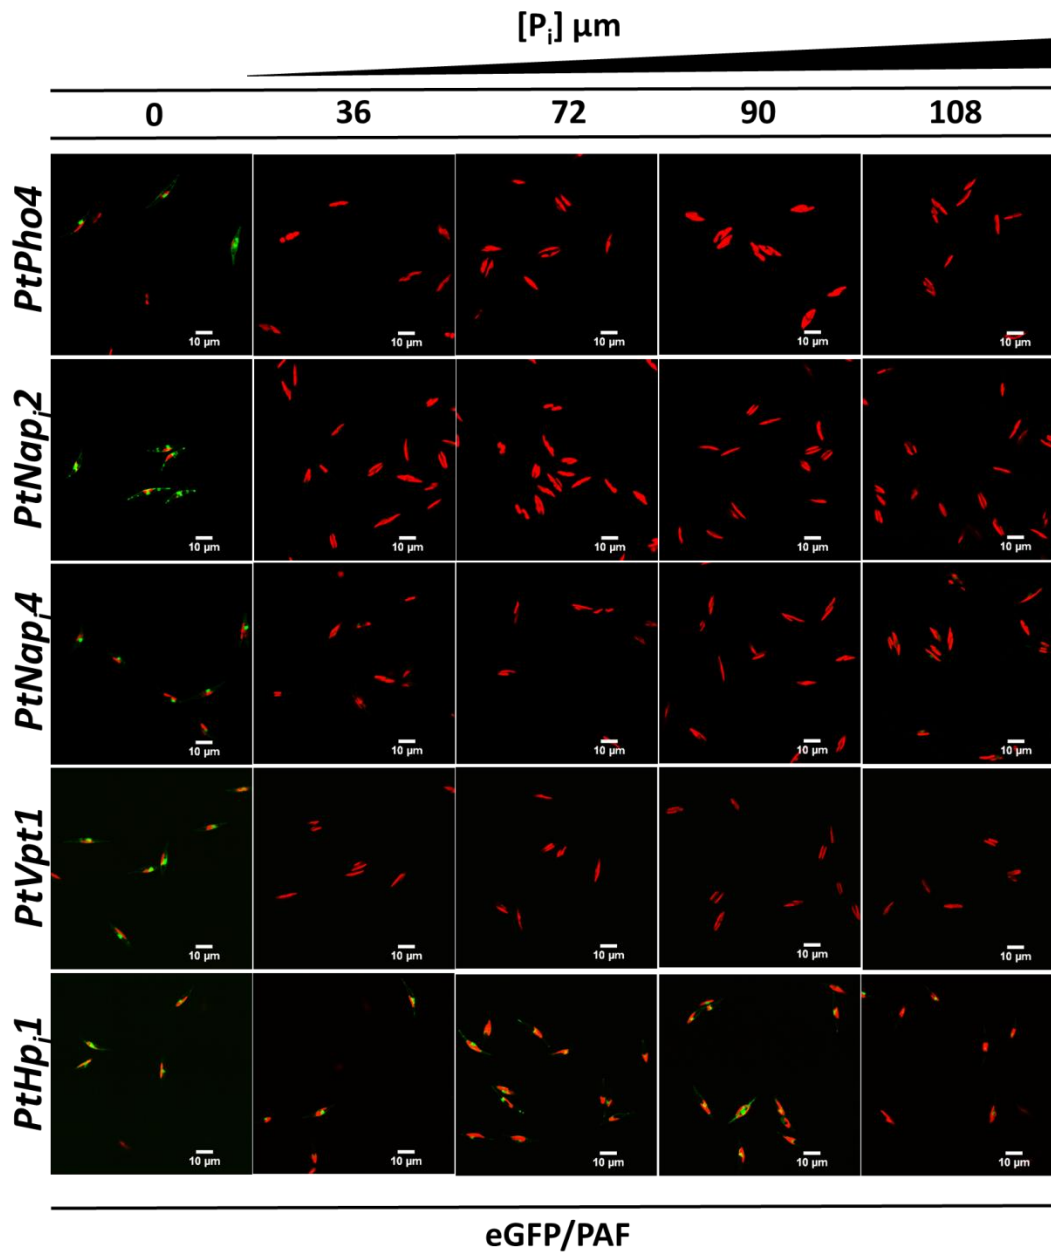

**Supplementary figure S1:** confocal scanner laser microscopy *in vivo* eGFP expression of different promoter/terminator cassette strains (denoted in the left side), incubated under different P<sub>i</sub> concentrations for 48h. Figures are shown as merged pictures with eGFP (green) and autofluorescence (red). For each cell line, pictures were acquired using the same setting.

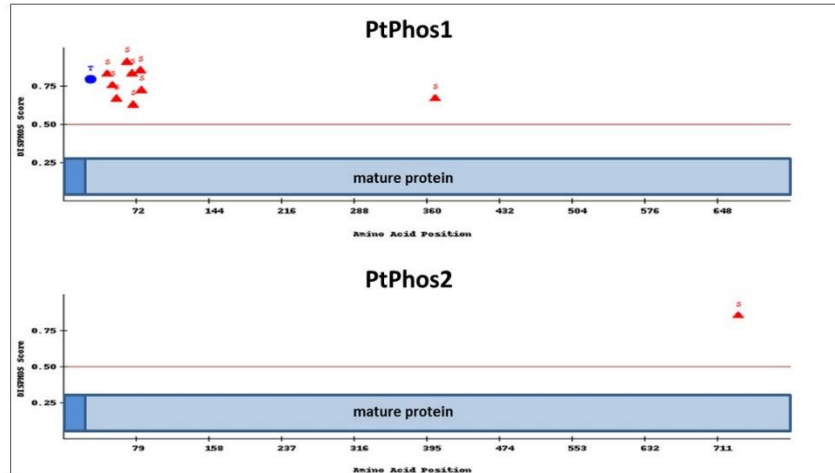

**Supplementary figure S2:** putative phosphorylation sites prediction using DISPHOS2 (<http://www.dabi.temple.edu/disphos/>). Predicted phosphorylation sites are shown with red triangle (serine) or blue circle (threonine).

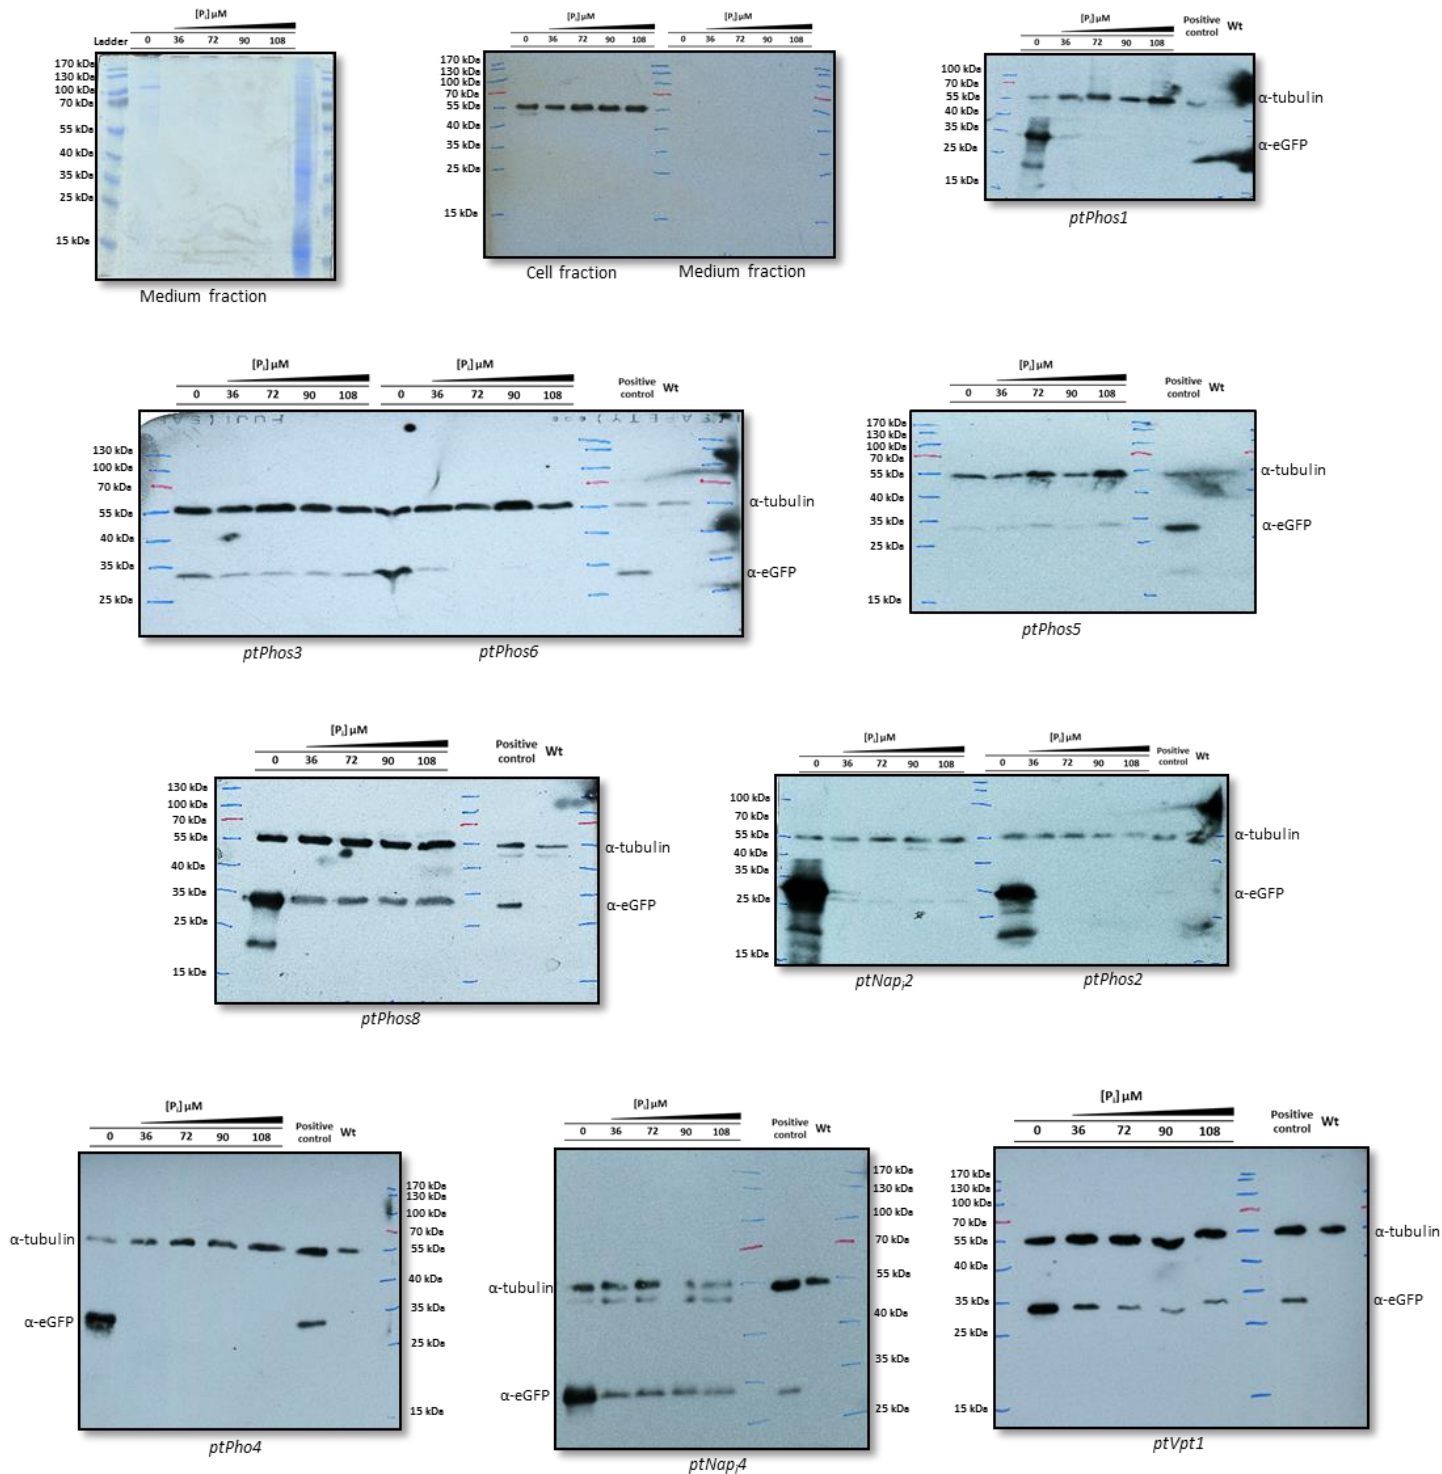

**Supplementary figure S3:** scans of all the blots and gels shown in this work. After protein transfer and blocking, membranes were cut at 40 kDa level and incubated separately with  $\alpha$ -tubulin (upper part) and  $\alpha$ -eGFP (lower part), as described in the material and methods section.

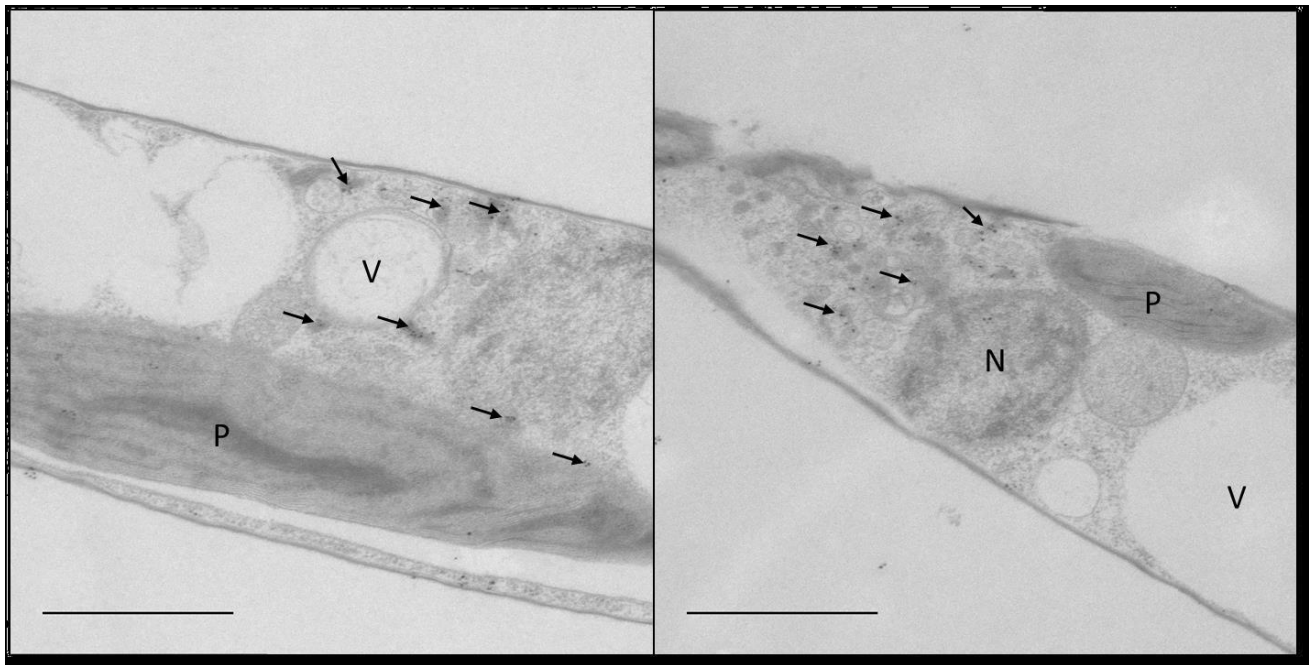

**Supplementary figure S4:** 50 nm ultrathin section showing PtVtc3-eGFP (black arrows). P: plastid; N: nucleus; V: vacuole. Scale bar 1  $\mu\text{m}$ .

| Running name         | Forward                                                    | Reverse                                                        |
|----------------------|------------------------------------------------------------|----------------------------------------------------------------|
| PtPhos3              | <u>GAATTC</u> CATGGAGAGTCAGGGGAAGGAATGT<br>CC              | <u>TCTAGAAAAGCTGTGAACTTGTGATGATAAAATT</u><br>GTTCCCG           |
| PtPhos5              | <u>GAATTC</u> CATGGCGGGTCCATCGAAACGGCCT<br>TG              | <u>TCTAGACTTTTTGTTCTGCTCATTCC</u>                              |
| PtPhos6              | <u>GAATTC</u> CATGAACGATGACCGGATAAGTGAC<br>CG              | <u>TCTAGACATCAATAATTTGGTGGACGGAACCG</u>                        |
| PtPhos6-Nterm<br>GFP | <u>CAGGTCTAGAATGAA</u> CGATGACCGGATAAG                     | <u>CTAGTCTTAAAGTAAATTGAAGCTT</u> TTACATCAAT<br>AATTTGGTGGAC    |
| PtPhos7              | <u>GTCACCACTTGTGCGAACGGAATTC</u> ATGAG<br>CCGTGCGCCAACG    | <u>CCTCGCCCTTGCTCACCATTCTAGA</u> GTCGATTTTG<br>AGTTGACGCTTGTGG |
| PtPhos8              | <u>GTCACCACTTGTGCGAACGGAATTC</u> ATGAC<br>GCAAATCTTGATCTTG | <u>CCTCGCCCTTGCTCACCATTCTAGA</u> AGCTA<br>GACCATCTACGGTC       |
| PtPho4               | <u>GAATTC</u> CATGAGCGTTGACATGAG                           | <u>TCTAGAGGCAGAGGGGGAAAAAG</u>                                 |
| PtHpi1               | <u>GTCACCACTTGTGCGAACGGAATTC</u> ATGGA<br>ACCATCGGACAAATTG | <u>CCTCGCCCTTGCTCACCATTCTAGA</u> AACAGTATCT<br>GCGAGAAC        |
| PtNapi1              | <u>GAATTC</u> ATGGTAAGTTGCCGTCTTCATATTG<br>AGTGTG          | <u>TCTAGACGCCTCGACTTCGTTGTCGTC</u>                             |
| PtNapi2              | <u>GAATTC</u> CATGTCTGCAGAAAATCCTGAGG                      | <u>GGATCC</u> AGCTGCAACCTCATCTGAGTCCG                          |
| PtNapi3              | <u>GTCACCACTTGTGCGAACGGAATTC</u> ATGGA<br>GATCAACAACGCC    | <u>CCTCGCCCTTGCTCACCATTCTAGA</u> TGTTATTCTC<br>AAACAGTATCTGC   |
| PtNapi4              | <u>GAATTC</u> ATGTCCAACGCACAATTCTTCTGTG                    | <u>TCTAGAGGCATCAACCTCAGCATCCGAAGTATC</u>                       |
| PtNapi5              | <u>GAATTC</u> CATGAATGTCATCCACGAGACCG                      | <u>TCTAGAGGATTTTCAACGGTAT</u>                                  |
| PtVpt1               | <u>GAATTC</u> ATGGTGAACCTTTGGCAATAAG                       | <u>TCTAGAGTCATCATTGTCTAAAGGCTC</u>                             |
| PtVtc1               | <u>GAATTC</u> ATGAGCCATTCTGAAACGACGCCG                     | <u>TCTAGACGCTTCAATCATCGAATAC</u>                               |
| PtVtc3               | <u>GAATTC</u> ATGCCGCCGCAACAGTCCCGAG                       | <u>TCTAGATACAGTCGCCGCAGCGCATTCG</u>                            |
| PtVtc4               | <u>GAGCTC</u> ATGAAGTACGGTGAACACC                          | <u>TCTAGACATTAGGTCCATTTTCGAAATGG</u>                           |

**Supplementary table S1:** primers used to amplify the genes for localization studies. Restriction sites sequences are underlined and sequences marked in yellow indicate the overlap generated to use the Gibson assembly reaction to generate the constructs.

| Gel slice | Description                                                                                                             | Coverage [%] | # Peptides | # PSMs | # Unique Peptides |
|-----------|-------------------------------------------------------------------------------------------------------------------------|--------------|------------|--------|-------------------|
| ~100 kDA  | Predicted protein OS=Phaeodactylum<br>tricornutum (strain CCAP 1055/1)<br>OX=556484<br>GN=PHATRDRAFT_49678 PE=4<br>SV=1 | 24           | 15         | 50     | 15                |
| ~130 kDA  | Predicted protein OS=Phaeodactylum<br>tricornutum (strain CCAP 1055/1)<br>OX=556484<br>GN=PHATRDRAFT_47612 PE=4<br>SV=1 | 12           | 7          | 22     | 7                 |

**Supplementary table S2:** summary of the Mass Spectrometry analyses performed on the bands showed in figure 1. These results are relative to experiment ran using the Orbitrap Velos Pro mass spectrometer (Thermo Fisher Scientific) and analyzed using Proteome Discoverer 2.2 (Thermo Fisher Scientific).

| P <sub>i</sub> concentration | Cell concentration |                |                |                |                |                |               |              |               |               |               |
|------------------------------|--------------------|----------------|----------------|----------------|----------------|----------------|---------------|--------------|---------------|---------------|---------------|
|                              | <i>PtPhos1</i>     | <i>PtPhos2</i> | <i>PtPhos3</i> | <i>PtPhos5</i> | <i>PtPhos6</i> | <i>PtPhos8</i> | <i>PtPho4</i> | <i>PtHp1</i> | <i>PtNaP2</i> | <i>PtNaP4</i> | <i>PtVpt1</i> |
| - P <sub>i</sub>             | 3,7                | 2,4            | 3,0            | 3,1            | 3,7            | 3,4            | 3,2           | 3            | 3,6           | 3,1           | 3             |
| 36 μM                        | 3,4                | 2,8            | 3,0            | 3,8            | 3,8            | 3,8            | 3,3           | 3,1          | 3,3           | 3,4           | 3,1           |
| 72 μM                        | 3,5                | 2,8            | 2,5            | 3,0            | 3,3            | 3,7            | 3,2           | 3            | 3,4           | 3,3           | 3,3           |
| 90 μM                        | 3,5                | 2,7            | 2,7            | 3,8            | 3,4            | 3,6            | 3,1           | 2,8          | 3,8           | 3,3           | 3             |
| 108 μM                       | 3,3                | 2,6            | 2,5            | 3,4            | 3,3            | 3,4            | 3,2           | 3,2          | 3,6           | 3             | 3,3           |

**Supplementary table S3:** cell concentrations of strains used in the expression studies two days after inoculation in media having different P<sub>i</sub>-concentrations (first column).  $2 \times 10^6$  cells/ml cells were initially inoculated. The values are expressed as multiple of  $10^6$  cells/ml.
