# Supplementary material for: Mobilization and Cellular Distribution of Phosphate in the Diatom Phaeodactylum tricornutum
Source: PubMed Central journal article supplement (PMC7283521; doi:10.3389/fpls.2020.00579), 2020-06-03
Supplement: Data_Sheet_2.pdf [file Data_Sheet_2.pdf]

**Supplementary file 2:** nucleotide sequences and length of the upstream and downstream regions used to design eGFP expression cassettes, obtained by Sanger sequencing of the fragments amplified from *P. tricornutum* (strain UTEX646). Untranslated regions (UTR) are underlined in blue.

>*PtPhos1* upstream region, 949 bp

CCGGTGTGTAATATACGATACCCGGAGCCGCGTTGGAGATTCATTCACTGTCAACGCTC  
GGCCACGGCAATTTGCCCTAATATCGTAACACATAAAAATGGCGACGTTCCCTGCACGAC  
CATAATTTTCGTTACGGCAGGGATTTTGGCGTCGAGATTCGTTTCATGGGACCAAACTAG  
CAGGAGGATTGGTTTTTTCAGCATAATAGATTTCGTGTCCCCGTTTCGATTTTTCTCTGCGGC  
CGTCCCACCGGACTCGAAAAAATTTCAAAGTTAGAGCATTTGGTGAAATCGTACGCCAA  
GTTTCCCGCTAGAAATAATGTGGACCGAGGGTTAAGTGTGCGCATGTGCGAAGAATGCG  
CTGGGAGCTGACTTCCCGGCCGACTGTAATTAGAGAAGAACATAGATTAAAAAAAGACT  
TGTC AATTCGGAAGACACACAAGTAGACACAGAATACTAAACAAGAAGAGAGAAGCATG  
ACTCATCTTTTTAAGCATCATAATAGATGATTTGCAGGGCGTTTGTATGAGTCAGCCAAGT  
GCAAATATGTTTTACGTGTCAACGAATCTTAAAGATCCATGACAAAAACGCCATACACCA  
GAACCATGAAATGGACGCTTCGTTAATGTAAAGTGTGCAATCTTCAGTTCACATTTTTCAA  
GATTCGCTAGATTCGACAGTGATAAATCATCTTTGTCAAACAATCTTCATGGTTGTTGAA  
CGATATACGGTCTATACGTCCTAAATCAGAGAACCGTTCACAAATTACAATTAGATTCTTT  
AGAGAAACCATGACCAGGCTCACGTGTACTTTCTTACAATTGATGGGATCGGATGCAAGA  
CCGAGGAAAAGATCTCATCTCTTGGGCGCACTGATAAAGCTCATAATTTTTGTGAGTTGCC  
ACCAAGGATTTTTCTATCGGCATCCTAACATTATCGGACCTGCAA

>*PtPhos1* downstream region, 523 bp

TCGGATTCTTGCAAGCTTGAGCACAGGAATTTGAGACTTATATATGTTGCGTCCGAAATTT  
ACAGTTAGGCTTTTCGTCCGATTTTGTATGTAGGCGGAAATAGCATAGAATCATGTTACA  
CAGTTAAGGCACTCATAGTTGTACATAGTGTGGTGCATTTTAGAGCTGTTTGGAAACAAGC  
AAACATTTTGAGTGCAGATTCCCCACCCATGGAATGTGAGCGTTGCTCGCGCAGAATGT  
CGATTTTACAGTTAGTTGGAACGGTGGCGCCCGCTGGAGCCGACTTTTGATTGGAAGTACT  
GTTCTGAACTGGTACACGTCGAGTCATACCCTGCCCTTCTTACATCTTATTGAGAGACGAT  
GGCACTTTGCGAACAAAGTGGTTGTGATGTTCTAACAGTAAATATAAAAGGCTGTAGGTA  
GTTTACCTAGCTCTACACGCAAACGGAGGACCGCATCAATTCGTCGGAGGCCGTTACCG  
TGTTGCTTAGGCTACCGACCGGCCCGTCTTTAGGCACTC

>*PtPhos2* upstream region, 1042 bp

GACCTGCAATACACCTAAGCGGGCCTAGGGACTGTAAACTCAACTCGCTTACGACGCTC  
CCCACGGGTTAGACAGCGGATACGAGGACCTATGCTAACGCAATATTTGGATCAATATCT  
TTCTAAAACAATGAGAAGAAGATTGTTCTACTACTAGTCCATCGGGCTTGAGAGGTCCAG  
TTCACTGGACTACCGTTACCATGTTCCAGATAATCTTACTCACATATATGAGTCTTGTTCT  
TTTAAGTATAAATCCCTAAAAAATATAGAAATCCTAGAAGCAGTCAGTAAATGTAAATC  
CATCACTAATGTAACCTAAGTTCCTCTACTAGTCAATTGTACAACATAAATTCTTCACT  
GATTGTGACTTTGAATTTTAGGACACACTCTCTAGAGAGGATTGATAGTGAAAACCTTAT  
TCATTGTCAGAGCTTAAGCCGGTCTGGTCTATCTTTCCACTGTCAAACAGCTCTTGATTGT  
CGCCCGCGCGAAAATAGTAGCACTAACTGTAACCTCAAATAACAAAATGTTCTCTGTTAC  
CATAAGTGAATGTAACCTTTGCAATTGACAGTATTAGTAGTCGATTGACAGTGAGGCAC  
GCCCTCAATGTGCGAGGTGGAAAATATACCAGCATGACAATGAATCTTGGAGATTCTTT  
TGCTGTCATCAAGATTCACCGCAAATCTTCAGGAACCTATCACGTCCACAGGCGATGTT  
AATTCTTGAGTCGTCAAACAAGTCTGTCCTACCTGTAGAAGTTGACAGCGAGCAATT  
GTATGCAAACCTTCTGACTTTGTTATAATAACATTAAAGGTAATTAAGTATCTTCAATTAGG  
CATTTTGTCACTGTGAGTCCGTTCCGACAATATAGGTAGATTTGGAATGAATCTTTTCTAT

GCTGCTGCGAATCTTGTACACCTTTGAGGCCGTAGATTCTGTCCGACGAAGCGATAATTA  
TTGCAAAATACATGGACTCATTATTTTGATTTCGATTTCTTTTTGGTATCCGACTCGAAAAG  
ATCCATCACGGCGAGC

>*PtPhos2* downstream region, 500 bp

GTATAGAAGGTCACGTAGCTAGAGAAAAGAAAGAGTTAATCTCAAAAAGAGTCAAGTCCA  
CGAACTTCAAATAAACATAAGTCTTCTTTTCGTTTACCCATTGGCCTTCATCCTTCCAATC  
AACACTCGATTCTGAACAGAAAATTGGACCGGGAATGATTCTGCGATACTGTAAGCGAT  
TTCCCTACCTGATTCTCGATGCCATTAATCTTCGGCAGCTGCGCGGCGCATTGCGTTCA  
GTGCTCTAATCGCCCTATGCTGTCCACCAGATGAAGCTCCGGTTGAAAGAACCGAAACAC  
GCCTAATATCGTCACGAAATTTTCTAATGACTTTTGGTTGGCATCGCTGCGAAACATGAA  
ATCAGCACGACGGGTCAAACACGCCAGAATCTGGTTTGACCTGAAGCAGCAAGTAGATA  
TACAGAACGAAGTCTGTGCTCGAACAGCAATTTCTACAGCAGCTTCTGCAAGGCCTCCGC  
AGCAATGGAGACCTCCGGA

>*PtPhos3* upstream region, 1000 bp

CGCATTTCGCAACCCGCTGGGTCGAATAAAGCGTTCGTATTTGGGAGCTTTCCGGGTAAAA  
GAGTCTCCTACAAAGGTGCATTTGGTAACCACACGCTTCCACGCCTTGTTCTGTTTCTTAC  
CGGTCCGCATGACTTTGAACATTTTCGTCATCGGCTACCGGCTTGACCTTGGGAATGGGCA  
CTTCCATTTTCCGGCCTTTTCTTTCCGCTTTTGGCTTAATCGTATTCGACAAAACCTTGCCA  
CGGGAGACACCTTGACGGTCTAACAAATAGGCCGGTACGGCCCCATCGGCGACGGCATC  
GTCGTCCGCGTGTGTTGTTGCGTTCGTTGTGCATCGCGATCGTTTTGCGCATGGTGGCC  
TTTTCTTGAACCGCTTCTTTTGGTAGAGTTTCGCCC GAATACCGTGTACTTTTTGGGCAA  
ATTCGGAGCGCTTGTGCACCATAACGCGCTTCTTTTTGCGCTCACGCTCCTCGGCGTCGAA  
CCGACGGCCGTGAAGCTTGGCGTGGCGTTCATATGTTTCGTGCTGCGGCATGGTGGAAACG  
AAGGACCTGTTGTTTATTGCGCAACTACGATTGTCGGAGAATATGAATGAATAAATGAAT  
GAATAAATTGGTTGTACCGTCTCTTGTGCACAGACGCTATTGTCTAGCGATGCGAACA  
AATCTGCCGAGATACGCCGGTGTACCAGCTTGGTTACTGGACGACGCGTCTATCCGGACG  
AGAAAGCCAGCGCGGAAAAACGGGAGATGCGCAAGTTTGGTCGGCATTATTTCTTGGT  
TGGCGAGTTGCCACGGGACCGGATGACGTCCAAACCTAACGACACCGGAAAATGTCTG  
ACATCTGTCCCAAAGCCGTGGACCTTATGTGAATTGTAAGACACACGCGCCCGAGAAGCA  
AAACCGCACTCCGGCACGCGATTTCGTCCTCCGGTGGGGGCGAATCTCAACGAACGGAGA  
ATTTGACCGTACGCGTTCGTCGTTCAATATTCTCATCGGTACACC

>*PtPhos3* downstream region, 538 bp

CACAATTCACATTTTTAAGTTTTCGAATGTGCTACAATAAACACCGTTTTTTCTGGAGCTGT  
TCCAGTTTTGTTCTGTTGTTGGGATGCTCGGGCTGTAAGAGCTGCTTGATAGACGTTGAA  
TATAACTGGTCGTCTAGTCCATTGGCCAGTACCTTGCTATAGAAGAATATCGGGTTATTG  
CTTCCAGAACC CGGACACGTCGATTTGCATCATTGGAGGCTCCAAGCGCTTCCGATGG  
TCCAAATTGCATTCGGATTGAAAGTGCCCGACCAAACCACAGTTCCAACAAGGTGTCGCC  
GCTGCGGCAGCCTGTAAGAGGCAACTTTGAGCTTGCTTGTGCGGGAGGAAGTGTGGGGCAC  
TGTCGGAGCCAGTGGTCTTCGAGTCACAAAGGAAGCAGACTCCGATTGATCGGTTCTTC  
CTTCGCTTTGCTTCGTAGCGTTCATTGTTTTGCCTGCGTTGCCTACGCTTTTCGTCGTTTTC  
GTAGCAGCAGACATACAAACAACGATCGGTAGGGGCAATATTCTTGGCCGTTA

>*PtPhos5* upstream region, 1073 bp

AGAAATCGCGTGGTTGGAAATTGATGCCCCCGAGTTATCGTAGTACATTGTGTTGATGG  
TACCGACGGCATGATCAAGTAGGGCGGCGTTGGCGGTGAGTCTTTCGTCGGAGTCCCTT  
CCCGCATAATGTTCCAGTAGCGCTCTTTAGAAGAAGGCAAACCTGACCATTTTCGCCTGCCA  
ATACCGGTGCTATCATCACGGAACATAATTTGCAGTGCACCAAAGCGCTGATGAGGCACT  
TGGACGCGTATTGGGCAAACGTTGGACCGGGAGTACGCGGGGGACGGCGGAGTGACCGCA  
TCAGTGTGGGAGCAAAGTCATCCGCATTGCACAAACGTTTCCGCGCCGTCAATGCCGTG  
GTAGGACAAAGGCCTAGAAGTACCTTACTTGAACGTGAATCCAACGACGATCGTGTAGGT  
GGTAAAATCCAAGCGTGCACGTCGCCTTGTGCAATAAAACCAATAGTGACGAGCAGCAG  
TGGCGTGAGAAGCCGACGACCGGAGAAGTTCCGAATGTTCCGACGGCTTTGGATCATCTC

ATTTCGAATCTCTCCTTGGGTGTACGGATACTCTGGGGGATTGTTACGGACTGGCAGTGGT  
GCAATGTTTGGATGGGTTTGACAGTGAATCGTCCCACAACCTTTCTGTTAGTATGCGACGAT  
TGCACTCTATAGGAGTAACGGAAGGAAAGGGCGAGAGGGCAAATTCGGTAAACAGCTCT  
TCGGTCCATGTAGGAATTCGGCAGAGAGCATGTCAGCCAACGTGTGCTGGTGGTTTTGCT  
GACATCACGATTATACCAATGGTCCTATGGTATTCCACGGATTCCAAAGGATACTTTCCCT  
CTTTATTCTCATTGGCCATAAATGTCGGACTTTGAACCTTCGCACCGTGCATGCTCCTAG  
CTAGTAGGACATATAGACTGGACACGTAGAGTAGTAGCACAGTATATCGGAAAGGAATA  
CAAAGTGCATTGACCTGAATGGTCCTCTCACACAGTCAGTCTCTTGTATACGTACAAAGC  
ACACACTCGGTTTCTAGTACCAGTGTATATGTGTGTATCGAACAAGAATACCA

>*PtPhos5* downstream region, 500 bp

GCTCCCGAATGTTTGTTCCTAGAGAACAGGACAAGCTAGGCCTCCAGCACTCTC  
CTTGGCACTGATTGGAGCGGAAACGATCACCGTATACAACTGTAATATGTGTTTGCTA  
ATTGACAGAGTACACGTCTTGCCAATGCAAATTAAGCCAGCACTGAACACTTATTACCTT  
AAAACATGGAACGCGTATTCGACTAGCCCGGAGTCGATTGAATCAACCAACACGGAAC  
ATTTCTTACGTCTACAGCGTGTTCGACTAGCCCGAAGTTGTTCCGGTTTCCGTACTTTCAA  
TCACCTTTGCCAGCTCTTCCCTGGCCGAGTCCTGAGAAGAGAAAGAAGTCAGGTTTGTCA  
AATTTACCAATACAAGTTTAAGGATTTTTTAATCACATACCTTGCAACTGTGACCCAGA  
GTGCACTGTCCAGAAGATTGTCTCGGGCAATGTGCATAATGTGGGATGTCAGATATTCG  
TTCATCCACCGCACTTGC

>*PtPhos6* upstream region, 1000 bp

TGTGAAAGTTTCTGCTCAAGTAGCAAATTGTAGGACAATAGAAAGGCAAAAAGGGAAAA  
CGAAAAGGATTTAAGAATAATGTGAGTAACGACTGAAAGGAAGCTGAGCTATTGTGCAA  
CCTGTGCAATGAGTAATTGGTTGGCAAAAATGTCTTGCCATAGCTTTTAATCTAAAAGG  
TTTTGTGGCAACAAGTTCAAATTGTCCGCGGCTTCGAAATTGGTATCGAAAGTATCTGTCT  
TTCGTATTTAGCAGTAAGCAGAGAAACATTCACCCAGAGCGAAGCACTCGAACAAAGTA  
TACCTATGGATATAAATGCTACACTTGGAAATACACTGCGTGCTCTACACTGAGGAATG  
GAATGGCGATGTAGCTGCAAAAAGTTGGTTCCGCCAACAGACTTTCGGAGAGCAATTGT  
TTGTTTGCCCTTCTAACACACTCTTACAGTTAATCGACTGAGAAATAGAGATAATTTCCAT  
TTTGCCGCGTTTAATTCGGGTCGTGCCCTTATTTTCCAAAGTCAAGATTCATCTCATTCTCA  
AGATTCTTCGCAACATGACGTTTCTTGCTTCGTCGAGAATCTCTACATCGCATGAAAATGT  
CTCTTTGTGAAGTCTTCCGTAGGAACTGGAACAAGCAATGCTGCCTTGGTGTAGGGCTCC  
GTAAGGCTAGTAGTGGTAGTAGATTTGTTTGAACGAATTTGAAGTTTAGGTTGGCTGAGG  
TCGCGAATCTCGGAGATGGATTGACAACCTGCCACTGAGAACTCCCACGCCGCACGCACAA  
CGATTTTTTACAATACAGGCCTTGTGCAACTGGCTAGAAAAGAAATAGACTCAGGCGT  
ACTTGATGCACTGTATTCCATTTTGAATCCTCAAAAAGAGATTTGGATTATCTGGTCCCT  
TTTGTGATTTTCAATTTCCGATTATCCCTGTCTCGCTTTGCCAGACCCATTGAAACATATTC  
GGGAAATCCACCCCGCTTTTTTCTTACAGTGAAC

>*PtPhos6* downstream region, 500 bp

AAAGTTTTTGTTCCTTTATAAAAATCATCGTTGGGACAAACGTTCTTCCCAATTA  
TGAACCGGCTTGTAGTTTACAGTCGTAACATAGGCAGCGACGACGCGCCAGGTCCGTACC  
ATGAAATCTAGAAGGCGCATTACGTATTCTAACGTTAAAAAATGCTATTGACCGTAAGA  
ACCCCTTGCCAGAATCTAAGACACGGCAGCAGCCTTGGCGTAGGTTACTTCGGGATTGGC  
TCCGTCGATAGTCTTGGTCGACTGGGCGGGCGTTGGAGCACTCGCAGGCTCACCGTTTTC  
CTTGACGAGTCCCAAGGGCTTGGAGACCGTCAAAAACAACGGTTTGAAAATCTCTTCCGT  
TTTACCGACCGCCCCATGACGGTCTGAACCACGGCCTTGATGGCAGGATTCAAAACGTT  
ATCGTCCAAGCCGTGCAAGTTGTGCCTAAACGGAGGGGAATCGAGAGAACAGAAAGATA  
CTTAGTATCATACGGTGTGCG

>*PtPhos8* upstream region, 910 bp

ACAGGTTTGTGCTTGGGAACAGCCGTCGCAACTGTCGTTGTGCTATAGTCTTCCGATGCC  
TTTCTAGGCGTCAAAGGAGACTTTTAATTCTCGTGTAACAAGCAAGAATTGTTTCAAAG  
CCAACAGTACTTTTTCTTCTAATTTACAGTCTTGTACCGTTTCCCATCTTCATCGACAGTAA  
GGTTGTTTCGTCCCCTGGCCTACGTAGTTTACGTGTGAGCGCTGTCAGTTGCAGCTATCAC  
AAGAAAAGACATTTGCACAGTGGCATTTCATCATGCAAAAAGACTGGTGGTGAATCAACAC  
TTAATGTGCATTTGCTGTTCAAACCTCCTGGAGTCTGGCGACAGTTTGTGCTCTGTATGC  
TTGGGGTAAAGTGTTACAGTCAACTGCTGTGAAGCAGATTGATCGAAGCTTGACGGGTT  
GGAGGCAGCTCATCCATGCCAATGCGATACCTCCGCTATATCATAACAGAGCATAACACC  
AAGCATTGGATTATTTTCTAATTGCTAATTTTACTTAAAAGCCGTTTCGCGTCGAAATAGC  
GATTTTTTTCATGTCGCAGAGACCGAAATAGCGGTTTTCTCAAGGTATTTCTATCCTTCTA  
ATTGACGTTATGTATGACACATTTGCTGTAACACTGGGAGAGGTTAATTGAAAGTTCCCT  
GCCAACTTATCTTACCAGATTCAAACCTCTGAAAGGAGATTCAATCCTCCCCTCGCATTCC  
AAACAAGATTCTTCTGCAAATCTTTTCGATTTGGAAAACAGATTCTTTTGATTCTTTCTGT  
ACCATCTAGTATGCCTCATTGTACCGACGCTCAAGTTCCTGCAGACCACAAAAAAGATC  
TTTGCACATTTTCGTTTACAGTTTACTGTTACGCTGATTTCCCTGGTGAAAAGAATTCTTCG

>*PtPhos8* downstream region, 500 bp

TTTTGTGGAGTTCTTTTTCTTTATCAATCCGGATTGTGATTGTTTGAAGTTTCCCTGATCAA  
TACCTGACATCGCTTGTCTACAACACTACTGGACCGAAACGGATTCACAGTCACTGTGAGTA  
CCTTTTGCATCTATATTTAACTACTCTTGATCGTTGGCTACGCCTGCAGAATTCAACTCTTC  
ATACAAGTCTTTTACGCCGAATCTACATACGCACAAAATTGATCTGTATTAACAGAAAGG  
CGGTCTACGGAACAACACTATGTATGATACAAAAAGCATATTCTTCTCCCATAGAAGAACAC  
TAAAATACGACTGCAAACCTTCTCATCATCAACTTATTCGACATCGTTGCGTTCGTCATCT  
TCGAAGATGATCCGCTGTAGCTCACGCAAAATGGCATTCCCAGGACTCGGTGTCCCTCC  
ACCGAAAGATGAACATAGTCCGGCATAAGATCCGAAACAATCTGTTGCGACTTTGCCGTA  
TAGTGGTTCGTTGCC

>*PtPho4* upstream region, 996 bp

GAAACACTGGTATTTAAGTCAAAGTCGTATCCACCGAGAACGCTACTAACTTGGACCTAG  
TGCCAAACAATAGCTCTTTGGACGGGACGGGTGGCAATGCGGATACCAAGACTGCGTCC  
ACAATCCAATACATCGCTGTGATCTTGTGCGCCCTGGTATCCTCCATGCCGTTACTGTCTC  
CATCGGACCCTCCAGTGTCCCCTCGCTAATACCTTCCCGACTGCCTTCCACTCAAAGTCC  
TCATCACCTCCAGGTAGTTCCAGTGCCTTGTGATCGGGAGTGCCTTCGAGCGCAAAGTCG  
GCTACGCTGTGTCAAATCCTTCGATTGCACCGTTGTTGAGTGCCTTGGGTATTCCATTGG  
CTTACCCTTCTGCAACCTTTGTCATTGCCGTGCGAAAGGCCGCCAGTACGCCTTTGGA  
AGCCCCGTGCGTATTTCCATATCCCTTTACGCTGACCCGAACCCTAATCTTCTGATGCCAC  
ATTAAGAAAGAAATTACACCGTTAAAAGTTTTGTGCGTAGGATACCAGTACTCGGAATCCG  
CTTCGACGTCTTCGTATGCCATTGCGTAAAAATTGCACACTTCGAAGAGACCTCACGACA  
GAGAGAAGGCCAAACAAATCGACTTATGTTTCGTTTTCTTTGCATCTTCGAGATTCATGCCG  
AGGAGTCGCTTTTCTAGCGCTTCACTGTCATGCAACAGGTAACACTCGATTGATGGCTGCCT  
GAGTCTTCCCTCGAATTCTCTTTTCCAGCATGAAATCTTTGGCCGGAAATCGATTTTACCGG  
TCTATTTGACTCCCATTACAATGATAGCCCTGAGTGAATTTTAAAGATCCGATACCGCAG  
AGAGCTCTTGGATACAATGCGAACTGTTCCAGACATTGCGATGATTGAAAAGTGGAAAA  
GTCGTACCTGAAGGGGAGCTTATAAACGACAGCCACTCTTCAACGATCTTCCCGAAAA  
GCTAGCTTTCCATTTTGGAGACCGATATCATC

>*PtPho4* downstream region, 500 bp

GACAGCTTGCATGCCCATGCACTGGATCCGTTTAAACAATGGGTAGAATATCCCAATT  
TGAGTAGCACTTAAAATAATTCCATGAATTTATATGCATTCATAAATTGGAATAGTGCTTG  
CTGTTAATTTTCATGAATGACATATATGAAAAATAACTTGTATAACAGTGAATTCATAAAT  
CAAAGAAAGAGAGGAAACTGTAAACTATTGGAAGGAGAAAGAGAATGCTGTTATAGCGA  
AAGAGTTTGAAGTAACAACAGGCTTATACCATCATTACTTTTGGTTTTCGTTTGTGCTCG  
ACGTTTGTATCCTCCCTATCGTCATCATGATTGCCACTCTCGCGTCCGTCTTCTTGCCTTC

TTCTGCAGCACCCGTCTCGGCATCATCATAAATTGCACAGCTCGTGTCTTCTTCGTTTTGA  
CTCGTCGCGAGCTCCAGATGCGCTTACCAGCTTCTTCCGAAATCCTTCCCCTACCACAT  
ACCCAGACTCGGTGT

>*PtHp1* upstream region, 996 bp

TCAGACCTCGGGCAGCAAGCCTATAAGCCCTACTGGGGTTCAACGGTGGTTGATTATTTG  
TTGAATCAGTCCAATGAATCTTCGTTGAGCATTATGGACGTTTCGAAAAGGACATCAATC  
ATGGCCGAAGACATCGTTTTTACGTTGAATCAACTAGGGATTTTGAAGATCATCAACGGT  
ATATACTTTATCGCAGCCGAAAAGAGCCTGCTTCAGCGATTGGCAGAAAAATACCCCGTA  
AAGGAACCTCGAGTGGATCCATCCAAGCTTCATTGGACTCCCTTTTTGACTGACATCAAG  
CGAGACAAGTTCAGTATACATAGCAAGAAGCCTAATGTTGAAACGGACGAAGTCCGAGG  
TACGGGAGGCTTTTAAATGGTGGCTTTCCTCAACCAAATTGACGAAGCCAATATTACTTT  
GAAAGGAGGTTTTCTACTGGCACACATTTCGTTGGCTTGATGAGCCTTGTCTACACCTGGCT  
AGGCAAGTTTGGTGGCCACGCGTGTTCGTTTTTTGCCGCGTTGTTTCGCTCTCATGAGA  
AAGTTACGATTGGGTAGAAAGTTGACTAATTGTATCACCAACAGTAAGGAATTCTGGCT  
GTTGCGCTTGCTTCACAAATACTTTCAAATCTTCTAGCAGACAATCATCTTTAACAGTTA  
GTGCAACGTTGAGGCTACGCTGCTGCCTCTAGAGGATTCAAATACTGCGCAGAACCGTGG  
GGCGGAAACAAAGTAGACTTTGATGGTTCAGGCAAAAACAGAGAATGCTCTCATCAGTG  
AAACATAACTCACCTTCGAGCTCCAATAGTTGGCTGTCAAATTTCCGCCGGTTGACAA  
TAGGTGTTCTCATTTTTTACGGACGCTCCTGTAATCATGATCGGACGGGAAAGCGAACTG  
TCTCACTTTCATCAACTCACTATCAGTTCTGCGCCACAAGTATTGGAAAAGCACCAACA  
ATTCAGCAACTTACACTTGCATTAGCGTTCGGTAAA

>*PtHp1* downstream region, 500 bp

GAAGGCAACACAGTTATTAACTTTAAGGAAGAAAGAACTAGGTAGTTGATCACGAATCT  
GTGGGTAAACAAAGAGCTTTACCGCGTACATTCACTTCAGTCTTCGCGGGCATATGTATA  
GGAAACAAATAAGATTGTCTCCAATGCGGCAAAAATGAAGCTTGATTTGCACACACAGCT  
AGAGCCTCTCTGATCCATCCACTCCAATTGATTGTAAAATATCACAGATGTACCATTTTAT  
CTCGTTAGAAATACTCCTTTCCTTAAATACTCCATTACATGGTTCTTTCTATTTTTCGAATT  
TTCTCGAGGAAAACCGCTATCCCGGTCTGCAAACTTAAAAAATCGCTATTTTCGATCAGA  
TCTGAAAATCGCTAAGTATTTTTGAGTGAGCGGAATCGGCTTTTAAAGTAAAATTAACAA  
TTATAATCCAATGCTCGGTGAATACTCTGCATATGATATAGCGGAGGTATGGCGCTGGCA  
GGGATGAGCTGCTTCCAA

>*PtNap2* upstream region, 991 bp

GGTACGATTTCCGGTGGACGCCAAAACGGACAAAATTTTGGGAGCCAGTATTGTGGGAG  
TTGGCGCGGGAAATATGATTTCCGGAAGTTACGCTTGCCATGCAGTCGGCAACTGGACTAG  
GATCACTGGCCAATGTAATTCATCCGTACCCAACCTACCGCTGAAGTCCTTCGCCAGTCTG  
GCGATCTCTACAACCAAGACCAAATGACAATGACGGCGAAAAAGATTCTCCGTGGTGTG  
GTCAAGCTGCAACGTTAAAGGGACTTCTGTTACATGCATATTTCTTCGGGGAAAGTCGGA  
CAAAGTGACTTTCTACATTTAAAGTCTGTGGGAATCAAGTTTTGGAGGTCAAAGATCTC  
ATAAATGTCAAAGATACTATCATGTTTGTAGCAGAGACCACAAATATGAATCGCATACT  
TCCAGAATTGCGAGCTGGATGACCATGATTCACCGTCAGGGGGGTATAGTGGTCAGTAGC  
ATATTTCTGACCGTGAAGCAGTACCTGTACAATGTTTCTGGTGCAAACGTGATACTTACTC  
GCATGGAGAGATAATGACGTAGAAGTTTCTTCTTTTTAGACAAGACCAGTACGCAGAGGG  
TTGTTGACATCCCTCCTCAATGAAATTTCTGATATATGTGGGCTCGTGGGGCACTGTCGATTG  
AAGATACACTGACGTAAGTTTCATGACGTCGAAAGCGAAAATGAACCTTTGACTTTGAA  
GCTCCATGAATCTGGAAGATTCATGTTGACTTCTGTAGAATTGGTATATTTCTTACGTAGA  
GATCTTTTGTGATTATACCTTTGCGATGAGCGGAGGTGGCCTGGCTATGTTCTTCATAG  
TATCAATAGTGATGTCTCATTCTTTCGAGCTCGAAATTTAAGAGATTTTTGGAGCTTGT  
TTGAAGGTCTGCTCACAATTTGCAGTGGCAGCGACCGTGAAACATTCTGACATACTGCGA  
GCTCGAGCAATCGTTTGAATAATCAACC

>*PtNap2* downstream region, 500 bp

GCATTC AATCACGAGAGGTCGATATCACCGTTGATCGGTTTGGAGTCCCCTCTATTTTCCC  
ATATTTCTGTTT TAGCCAAATAAATACTGTGCCGAGAGCTTCTCGTTGTGTGTGGTTTTGC

GCACACTGCTGGAGAATATAACATCTTGGATTAAAGTGTCTTTTACTTCCCCTTTCTGTGC  
TCCAACCTTTAAATGGCTTGGTTGACTTCCTTGATCTCCAGCAGGATTAGTCCTTTTGAAAA  
AATGGTGTGTTTCAACCGGCGCAACTACTACCTCTTTCTCCGGTTCACCGGATTGCCAT  
CAAGTGTCTCGTTTTTTCACAGCACATCATTCTGACGATCGCTTCCAAAGCCGACGTGAAA  
AACGAGGAATATTGGTGAGTTGCTTCACTCTAGGCTGGAGAAACACGTTGGCCGGCGTGC  
TCAAATCTTTCTTCCATACACGATTGCAAAGTTCATCTCACAATGCGGTATTCTTACTG  
TAAATGCAATTTAT

>*PtNap<sub>4</sub>* upstream region, 1000 bp

AATTTGGTTGTTTTATTTGAATATTGTGCCAAGTCTGTTCTCGCTTGTTAAAGCTAGAGTT  
ACTATAAACCTTTGGAATATAACCACGCTTTTTGTTTTGATTCCGTTGTACGTAGGTATTCTA  
AGGTTCTGTGAAGCCCTCTTAAACTAGGACTTTTGACCAGGGGGGAAATGGTCTACAAT  
TAGAAACTCTATTCCAATTGGAAGAATCGCTCTCGCAAGAATCCTTCAATGAAACAAAAA  
TGTTCACTGTCAATTCTGGGAGGAGAGGAGGATGTGACCGTGTGCTACAAACTCAGTAGAA  
GTAGGTTTTACATTAAGACAAATATCCATTTTTGATGTCCAAAGTCTCGGAGAATGGGT  
CTTTTAAATCAGGGCCTGGAGCGGATTGATTGATACCACAGATTTGATCATTGCGAAACA  
GAAAATTTCTCAAGTTTTCACTTCTCTAGTTTCTGATGCTTGTTCCTCACAGTCAGTATTAG  
GCGAAACTTTATATTCTGGCAGTGAATTCCTTTTATTGTTGGCACGCTTGATCTATAGAGA  
TTCGGACTAGAGTAAGAGAGTTTAGACTTGGGACGGATCATCTCGCTATCCTAAAAAATG  
TACCTGAAAAATCAAAGTTTTTGGGACGATGTTGATTCACCCTAATGTAACATATGGATA  
AATTTGAGTTGACGTTTATCGGAGACTTCACGCAGCTCATGTCAACAGTTCTGGACATGTT  
TCTCTTTCTAAGAAAGAGATCGAACCGCGACTAAACGACGGAATTTTATATCGAAAGGAT  
GACGTCAATCGGCGCTCCATTGCTTTTACAAAGAAAAAGATTTTCCGCGATGTGAATCTG  
CGAGATTCGTGATCGATTCTGTAGAAACGGTATACTTCGTACGTAGATCTTGAAATTATCT  
CGTGGATTTGTGTAGGAGGCCGTACATACGTGGCTCAGTCAGCTTGATGTGAGTTGTCAC  
TTTCGCCTTTGGTCTGACTTTGAGGAGTCTCC

>*PtNap<sub>4</sub>* downstream region, 500 bp

GCACCAAACAAGAGGTCGATATCGCCGAATATTGGTTGGAGGTCCCCTTTTGATTATCCG  
TTTAGTATATATAGTATATAACAACCTGTGCCAAGACCATAGTTCTCGCAGATTCTGCTTGA  
GAATAAAATAACTTGGGAATGTTTATCTTATTCTGACTGCATGTAGAAACATTATAGTATC  
AGGATGCTGCACACAGCTCTTTTCATTTCAACTGCGGTTCAAACCTAACTGTAACCTTAAT  
CGTTGTGCTGTCAATGGTCGGCGTCCCTAGCCGTAAAAAGGTTAACGCCACATTCATGAA  
TCAATTGTTTCTTAACTTTGCTTCTGAATCTATCGGCGTGTACGTTTCTCCCTATTAAGGTC  
TAAAGAGAGAATGTGACTTCGAGTAGAAATAGGATATCTATTCATATACGAACGATTTTC  
ACTCACCTCGCCGTGAACCTCAACAATTATATCGACCCTGACAGCACGAGCAGTCGTGTT  
GCACAGTGCACCCGA

>*PtVpt1* upstream region, 1025 bp

TTGGAAACCGAATTTTCAGCTGTGTGCGTACCCGCGATACTCTGATGTGCTGGAATAGCA  
GCCGGGCTGCGTTGACTGGATTGGGCGTGGTATTCATCGTTTCGTCATCGCTTGGCGTTCAC  
TGTAGGCATTCTGCGAGTCAGGTTTTTTATCAGCGAGACCACCGCGGCACTCTACAACGG  
TCTCTGAATTGTGTGGCTTATGCACAATGTGACCAAGAAGAAGTAGGGAAGGGGACA  
GCCAACGAATCATTGGCTTTGACGCGAGTATTCACAACAGAGATTTTCGCGCCAACGTCG  
ACTTTTTCTTGTGTTGAGGAGGAGCCAATACCGAGATTTTCGCTGGTTCGTTGCCCGGGGAG  
ACTGTACATTCATCTCCGCTGCGAATGGGAAGGGCGCAACGACCCTTGATGCTGTGGT  
CGGTATTCATATGGTGACGGAAGTACTCAGTGCGTTGCCGAAACAAGCCAACGAAAATAT  
TGTTGTATTCCAAATGGCGATTTTTGCTGTTTGTGACGTCGCGTTGCTTACAGTGAATAAC  
GAAATTAACAGTACCATAAAAAAGGAGGCAATGTGAGTTTTTCGTTCAAATTACCAAATT  
CTTCCCAGTTCGACAGGATTTCTGCGTTGGCAACAACATTCCTGATTCCATAGATTAAT  
TTCGAATCAAAGTATGGTAGGTATTGATAGACCAAGCGAGATTCATTTTGAATCTTAC  
AGAAAAGTCTGTATCTCTGTCCACGCAAGGTTGTCTTTTTTGTTCGTGCTTTCGAAAGCAT  
CGTTTCTGATATTGCGTGAAAAGCATAGGTATACCCATTTTCATCGGCAAAACCGACTTTTT  
TGCATCTATGGATTGTTGCAAAACACACTCGAATATATTGACTTACTGTTAGAATCTCGTA  
GTGCAACTTTACGCATACGCAGAGGCGCTGCCGAGACGACGCGACGTAACCTCTAGTCGC  
GTTCTTGAATTGTGAATGACGCCGTTACCGTTCCTTGGCGAAAGCTCAATTTTACAAAC

>*PtVpt1* downstream region, 503 bp

AGGTAGTAACATTGCCTCTTGGTGCTACTACACGATTTGATATCGATATCCTTCAGTACAT  
GTTGACATGTGAGTAGAATGTGCAAATAAAAACGAAAACAATTTGCGGAGACTCTTCAA  
AATATCATCCCCTTTAAAAATTTTCCTTATTTTTATGGACACATAGTAAACTATATAGAAGT  
TTGTGTTCTTATACATATAACCTGCGGACTGGTGACTCACTTGTTCACTTTAGATCTGCTCC  
GTTCAATTGTTCCCTTCAACCCTTGAGCCTCCTTGTTTTGTAGCATAAATTCGTAGCCCCGCT  
TTTTAATGTACGGGCGTAGAGATTTAGTATTGATTGGATTCCACCAACAGTGGGTGCAGC  
GAATTATGGTATCCAAATTTTCTGGATCACAATGCATGCTGTGCTTGGATCGGTTGTCCCG  
AATCGTGGATCTAATTTTCGTCCTTGAGCTCCGTCGAAATGGTATGCTCTGACGCGTACAT  
GTGAGTCACCTTGGTATC
